# Supplementary material for: PolyPEGA with predetermined molecular weights from enzyme-mediated radical polymerization in water
Source: Royal Society of Chemistry journal article supplement (doi:10.1039/c1cc10989h), 2011-01-01
Supplement: c1cc10989h.pdf [file c1cc10989h.pdf]

# PolyPEGA with predetermined molecular weights from enzyme-mediated radical polymerization in water

Yeap-Hung Ng, Fabio di Lena and Christina L. L. Chai

## Experimental section

### Materials

Catalase from bovine liver (CBL, lyophilized powder, 2000-5000 units/mg, Aldrich), laccase from *T. versicolor* (LTV, 21.8 units/mg, Sigma), peroxidase from horseradish (HRP, Type II, essentially salt-free, lyophilized powder, Aldrich), L-(+)-ascorbic acid (AA, 99+%, Alfa Aesar), ethyl  $\alpha$ -bromoisobutyrate (EBiB, assay 98%, Aldrich), 2-bromopropionitrile (BPN, 97%, Aldrich), iodoacetonitrile (IAN, 98%, Aldrich) were used as received. Water was dispensed from an AquaMAX<sup>TM</sup> deionized water purification system. Poly(ethylene glycol) methyl ether acrylate (PEGA,  $M_n$ =454 g/mol, Aldrich) was passed before use through a short column of alumina to remove the inhibitor.

### Radical polymerization of PEGA in the presence of CBL

In a typical reaction, 0.5 mL of PEGA was mixed with 2 mL of deionized water to form a homogeneous solution. The mixture was deoxygenated by bubbling argon for ca. 45 min. CBL (20mg) and AA (50 mg) were placed in a Schlenk flask. The flask was sealed with a rubber septum and three vacuum/argon cycles were done. The PEGA/water mixture was transferred into the Schlenk flask using an argon purged syringe. Subsequently, 3  $\mu$ L of

BPN was syringed into the flask and the resulting mixture was heated to 60°C in an oil bath.

### **Radical polymerization of PEGA premixing CBL and AA**

In a typical experiment, 0.5 mL of PEGA were mixed with 0.5 mL of deionized water to form a homogeneous solution. The mixture was deoxygenated by bubbling argon for ca. 45 min. CBL (20mg) and AA (50 mg) were placed in a Schlenk flask. The flask was sealed with a rubber septum and three vacuum/argon cycles were done. 1.5 mL of deionized water was then transferred into the Schlenk flask using an argon purged syringe. The homogeneous mixture was stirred at 60°C in an oil bath for 1 h. Subsequently, the PEGA/water mixture was transferred into the Schlenk flask using an argon purged syringe. 3 µL of BPN was syringed into the flask and the resulting mixture in order to initiate the polymerization.

### ***In-situ* chain extension experiment**

Deionized water was deoxygenated under argon for 1 h before use. 0.5 mL of PEGA was mixed with 0.5 mL of deionized water to form a homogeneous solution. The mixture was deoxygenated by bubbling argon for ca. 45 min. CBL (40mg) and AA (100 mg) were placed in a Schlenk flask. The flask was sealed with a rubber septum and three vacuum/argon cycles were done. 1.5 mL of deionized water was then transferred into the Schlenk flask using an argon purged syringe. The homogeneous mixture was stirred at 60°C in an oil bath for 1 h. Subsequently, the PEGA/water mixture was transferred into the Schlenk flask using an argon purged syringe. 5 µL of EBiB was syringed into the

flask and the resulting mixture in order to initiate the polymerization. After 6 h, sample was taken from the reaction mixture via an argon-purged syringe for the determination of monomer conversion. 0.2 mL of deoxygenated PEGA was added as second batch monomer and the polymerization was continued for another 20 h.

### Characterization

Monomer conversion was determined by  $^1\text{H}$  NMR spectroscopy performed on a Bruker UltraShield spectrometer operated at 400 MHz. The number- and weight-average molecular weights ( $M_n$  and  $M_w$ , respectively) as well as polydispersity indices ( $M_w/M_n$ , PDI) of polymers were measured by size exclusion chromatography (SEC) system equipped with a Waters 515 HPLC pump, a 717plus autosampler, a 2414 refractive-index detector, and the following Styragel<sup>®</sup> columns arranged in series: guard, HR5E (4.6 mm ID  $\times$  300 mm), HR1 and HR0.5, using THF as an eluent, operated at 0.3 mL/min and 40°C. The instrument was calibrated with poly(methyl methacrylate) standards.

Table 1S

| <i>Entry<sup>a</sup></i> | <i>Initiator<sup>b</sup></i> | <i>Enzyme<sup>c</sup></i><br>(mg) | <i>AA (mg)</i> | <i>Conv.%<sup>d</sup></i> | <i>M<sub>n</sub></i> | <i>M<sub>w</sub>/M<sub>n</sub></i> | <i>M<sub>n,theo</sub></i> |
|--------------------------|------------------------------|-----------------------------------|----------------|---------------------------|----------------------|------------------------------------|---------------------------|
| 1                        | BPN                          | 20                                | 50             | 89.7                      | 9926                 | 1.48                               | 14392                     |
| 2                        | BPN                          | 20                                | 20             | 93.8                      | 8872                 | 1.47                               | 15036                     |
| 3                        | BPN                          | 20                                | 10             | 95.9 (5h)                 | 8698                 | 1.47                               | 15366                     |
| 4                        | BPN                          | 20                                | 50             | 80.8                      | 12027                | 1.65                               | 12974                     |
| 5                        | BPN                          | 20                                | 50             | 53.7                      | 8776                 | 1.62                               | 8666                      |
| 6                        | BPN                          | 10                                | 20             | 56.3                      | 9457                 | 1.63                               | 9076                      |
| 7                        | BPN                          | 10                                | 50             | 36.5                      | 8781                 | 1.60                               | 5935                      |
| 8                        | IAN                          | 20                                | 50             | 26.7                      | 10682                | 1.55                               | 4377                      |
| 9                        | EBiB                         | 20                                | 50             | 49.9                      | 8545                 | 1.61                               | 8132                      |
| 10                       | BPN                          | 10 (LTV)                          | 50             | 69.6                      | 11357                | 1.68                               | 11194                     |
| 11                       | BPN                          | 10 (HRP)                          | 50             | 95.6 (5h)                 | 10156                | 1.58                               | 15328                     |
| 12                       | BPN                          | 2 (HRP)                           | 50             | 62.3                      | 9550                 | 1.53                               | 10034                     |

PEGA/Initiator=35/1, PEGA=0.5mL, Water=2mL

a. For Entry 4-10, polymerization was carried out with premixed enzyme and CBL.

b. BPN= 2-bromopropionitrile(3μL), EBiB= ethyl 2-bromoisobutyrate(5μL), IAN= iodoacetonitrile(2.5μL).

c. The enzyme used was CBL, unless specified otherwise.

d. Conversion was estimated at 8 h, unless specified otherwise.

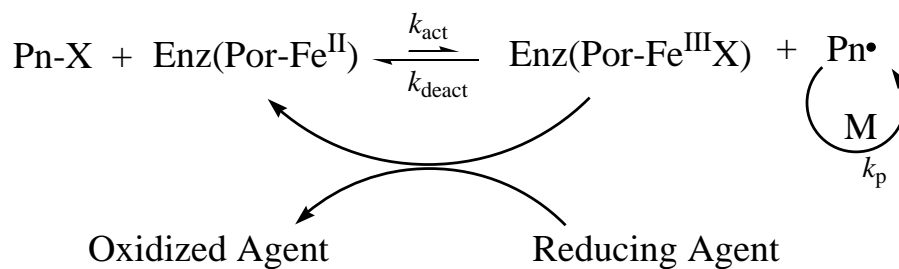

**Scheme 1S**

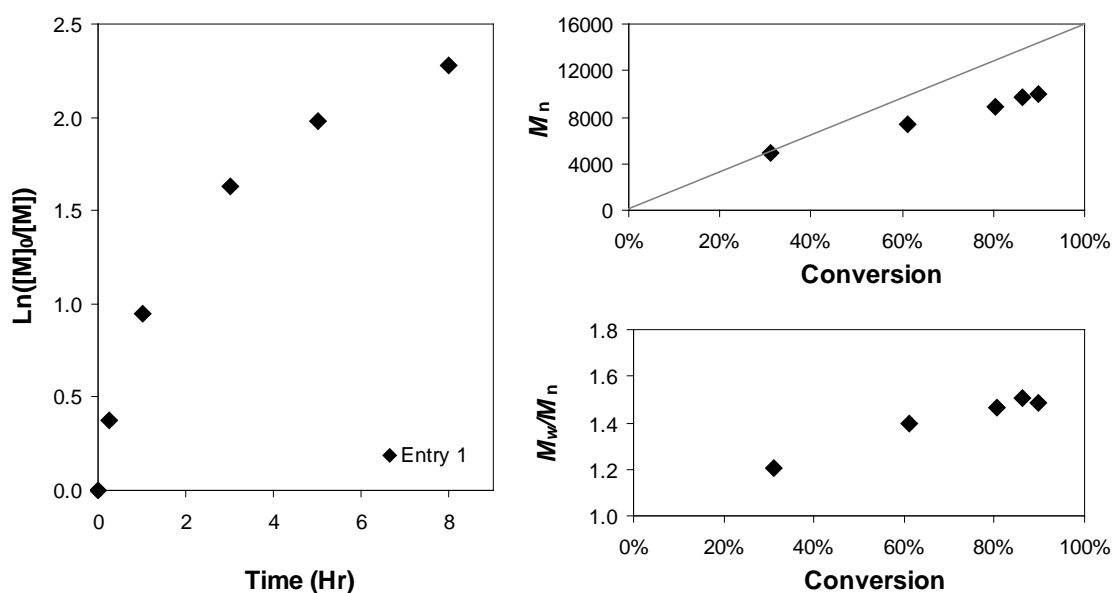

**Fig. 1S** Kinetic plot (left) and number-average molecular weight ( $M_n$ ) and  $M_w/M_n$  of polyPEGA vs. percent monomer conversion. See Tables 1S and 2S for experimental conditions.

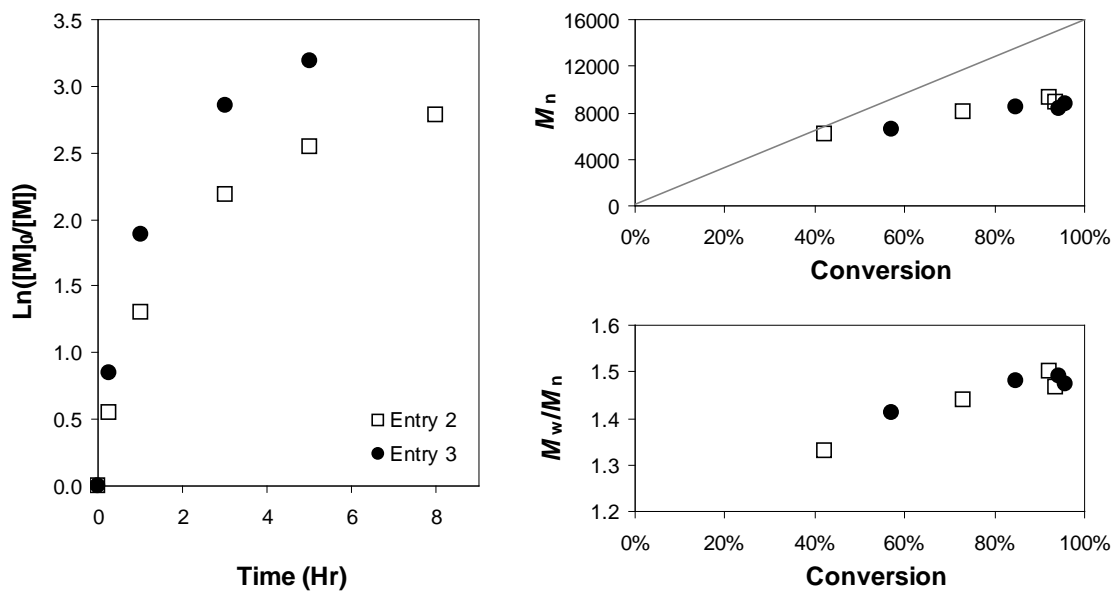

**Fig. 2S** Kinetic plot (left) and number-average molecular weight ( $M_n$ ) and  $M_w/M_n$  of polyPEGA vs. percent monomer conversion. See Tables 1S and 2S for experimental conditions.

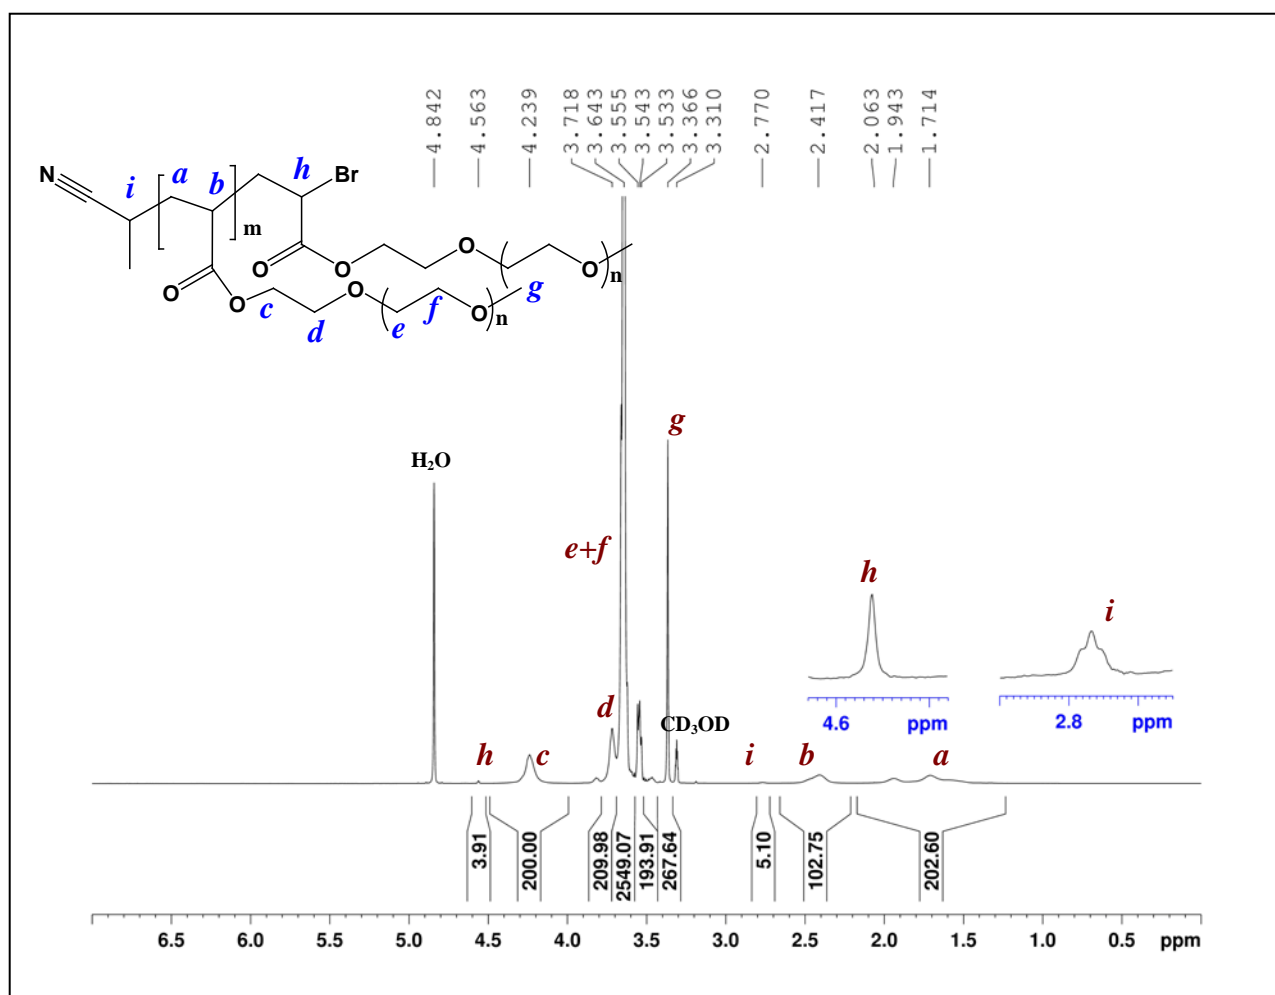

**Fig. 3S.**  $^1\text{H}$  NMR spectrum of polyPEGA produced in Entry 4 (Tables 1 and 2).

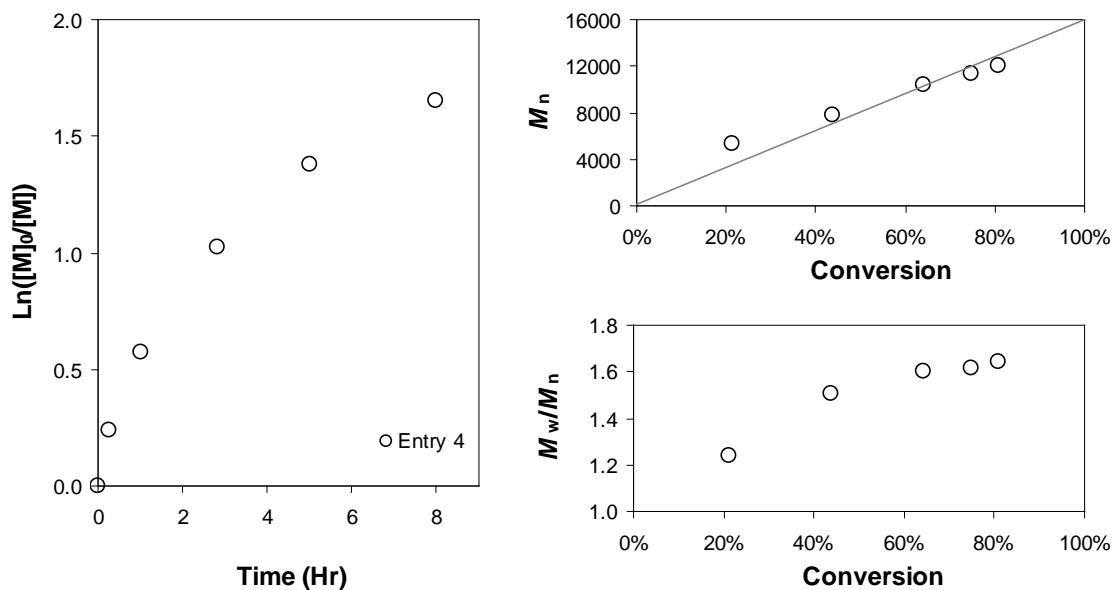

**Fig. 4S** Kinetic plot (left) and number-average molecular weight ( $M_n$ ) and  $M_w/M_n$  of polyPEGA vs. percent monomer conversion. See Tables 1S and 2S for experimental conditions.

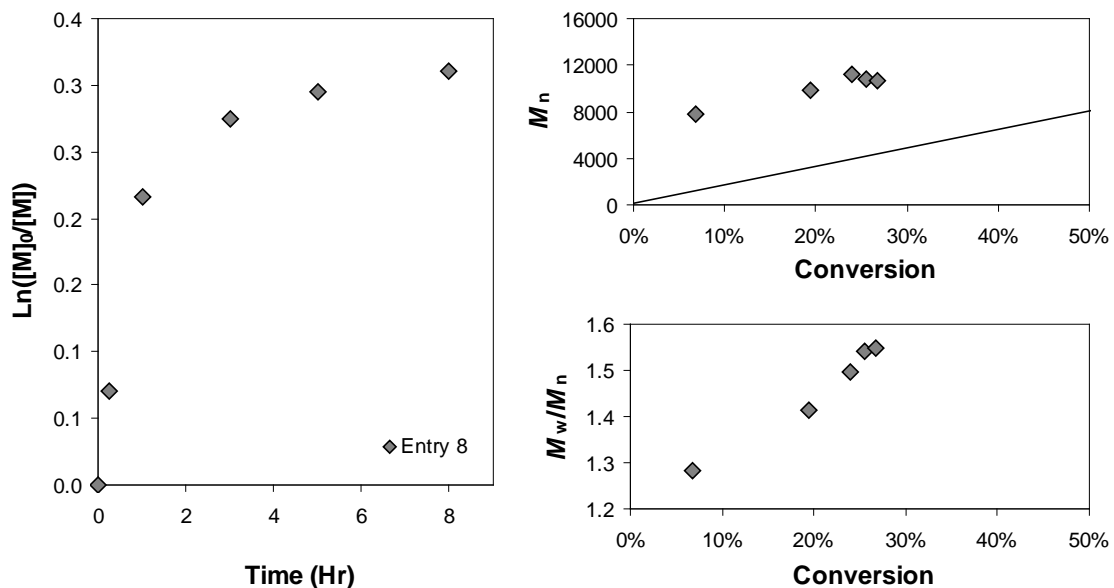

**Fig. 5S** Kinetic plot (left) and number-average molecular weight ( $M_n$ ) and  $M_w/M_n$  of polyPEGA vs. percent monomer conversion. See Tables 1S and 2S for experimental conditions.



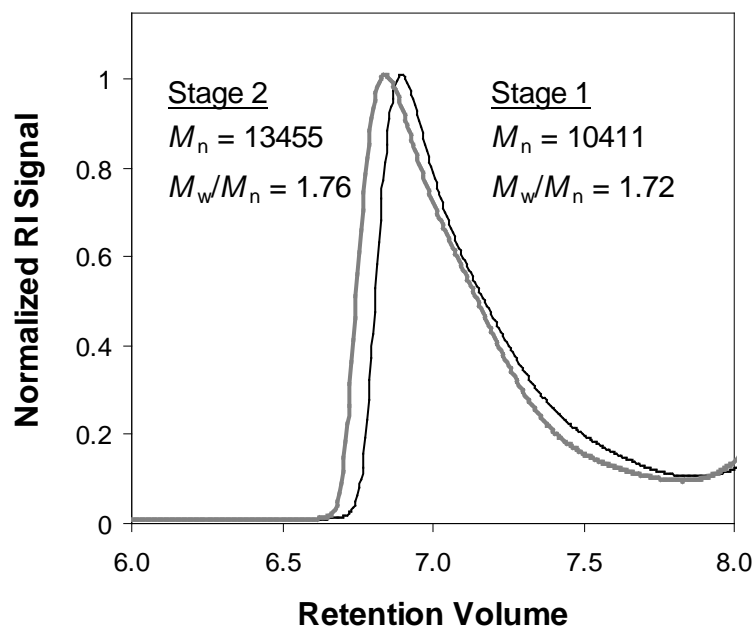

**Fig. 6S.** *In situ* chain extension of polyPEGA.

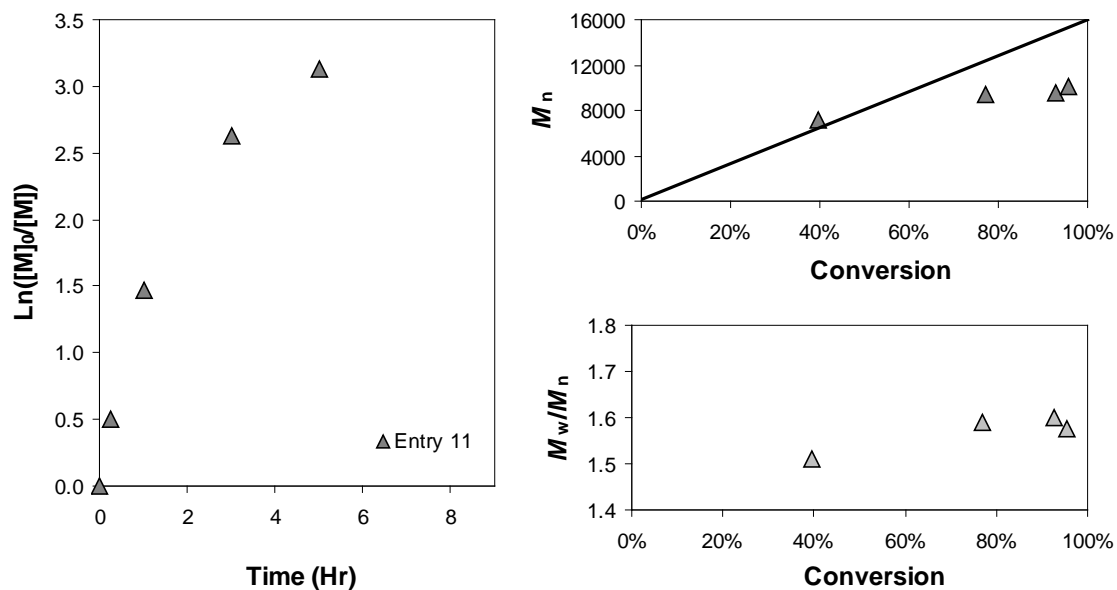

**Fig. 7S** Kinetic plot (left) and number-average molecular weight ( $M_n$ ) and  $M_w/M_n$  of polyPEGA vs. percent monomer conversion. See Tables 1S and 2S for experimental conditions.

**Table 2S.** Detailed kinetic data

| <i>Entry 1- CBL=20mg, AA=50mg, BPN=3μL, Temp=60 °C</i> |        |       |           |              |
|--------------------------------------------------------|--------|-------|-----------|--------------|
| Time (hr)                                              | Conv % | $M_n$ | $M_w/M_n$ | $M_{n,theo}$ |
| 0.25                                                   | 31.0   | 4986  | 1.20      | 5063         |
| 1                                                      | 61.2   | 7321  | 1.40      | 9854         |
| 3                                                      | 80.4   | 8857  | 1.46      | 12915        |
| 5                                                      | 86.2   | 9708  | 1.50      | 13837        |
| 8                                                      | 89.7   | 9926  | 1.48      | 14392        |

  

| <i>Entry 2- CBL=20mg, AA=20mg, BPN=3μL, Temp=60 °C</i> |        |       |           |              |
|--------------------------------------------------------|--------|-------|-----------|--------------|
| Time (hr)                                              | Conv % | $M_n$ | $M_w/M_n$ | $M_{n,theo}$ |
| 0.25                                                   | 42.2   | 6094  | 1.33      | 6842         |
| 1                                                      | 72.9   | 8053  | 1.44      | 11723        |
| 3                                                      | 88.7   |       |           | 14229        |
| 5                                                      | 92.2   | 9298  | 1.50      | 14777        |
| 8                                                      | 93.8   | 8872  | 1.47      | 15036        |

  

| <i>Entry 3- CBL=20mg, AA=10mg, BPN=3μL, Temp=60 °C</i> |        |       |           |              |
|--------------------------------------------------------|--------|-------|-----------|--------------|
| Time (hr)                                              | Conv % | $M_n$ | $M_w/M_n$ | $M_{n,theo}$ |
| 0.25                                                   | 57.1   | 6593  | 1.41      | 9202         |
| 1                                                      | 84.8   | 8478  | 1.48      | 13612        |
| 3                                                      | 94.2   | 8351  | 1.49      | 15108        |
| 5                                                      | 95.9   | 8698  | 1.47      | 15366        |

  

| <i>Entry 4- CBL=20mg, AA=50mg, BPN=3μL, Temp=60 °C</i> |        |       |           |              |
|--------------------------------------------------------|--------|-------|-----------|--------------|
| Time (hr)                                              | Conv % | $M_n$ | $M_w/M_n$ | $M_{n,theo}$ |
| 0.25                                                   | 21.3   | 5314  | 1.24      | 3517         |
| 1                                                      | 43.8   | 7744  | 1.51      | 7096         |
| 2.8                                                    | 64.2   | 10364 | 1.60      | 10329        |
| 5                                                      | 74.8   | 11318 | 1.62      | 12015        |
| 8                                                      | 80.8   | 12027 | 1.65      | 12974        |

|    |      |       |      |       |
|----|------|-------|------|-------|
| 22 | 85.5 | 12794 | 1.71 | 13718 |
|----|------|-------|------|-------|

*Entry 5- CBL=20mg, AA=50mg, BPN=3μL, Temp=40 °C*

| Time (hr) | Conv % | $M_n$ | $M_w/M_n$ | $M_{n,theo}$ |
|-----------|--------|-------|-----------|--------------|
| 0.25      | 14.1   | 5067  | 1.13      | 2370         |
| 1         | 26.5   | 5435  | 1.26      | 4347         |
| 3         | 40.8   | 6893  | 1.48      | 6623         |
| 5         | 48.3   | 8234  | 1.57      | 7816         |
| 8         | 53.7   | 8776  | 1.62      | 8666         |
| 22        | 61.7   | 10303 | 1.68      | 9932         |

*Entry 6- CBL=10mg, AA=20mg, BPN=3μL, Temp=60 °C*

| Time (hr) | Conv % | $M_n$ | $M_w/M_n$ | $M_{n,theo}$ |
|-----------|--------|-------|-----------|--------------|
| 0.25      | 20.8   | 5537  | 1.28      | 3443         |
| 1         | 32.9   | 6872  | 1.48      | 5367         |
| 3         | 47.3   | 8346  | 1.60      | 7643         |
| 5         | 54.1   | 9588  | 1.62      | 8731         |
| 8         | 56.3   | 9457  | 1.63      | 9076         |
| 22        | 60.6   | 10475 | 1.63      | 9771         |

*Entry 7- CBL=10mg, AA=50mg, BPN=3μL, Temp=60 °C*

| Time (hr) | Conv % | $M_n$ | $M_w/M_n$ | $M_{n,theo}$ |
|-----------|--------|-------|-----------|--------------|
| 0.25      | 11.2   | 5410  | 1.16      | 1916         |
| 1         | 20.7   | 6119  | 1.32      | 3424         |
| 3         | 30.7   | 7892  | 1.53      | 5017         |
| 5         | 35.0   | 9549  | 1.66      | 5691         |
| 8         | 36.5   | 8781  | 1.60      | 5935         |
| 22        | 38.9   | 10242 | 1.67      | 6319         |

| <i>Entry 8- CBL=20mg, AA=50mg, IAN=2.5μL, Temp=60 °C</i> |        |       |           |              |
|----------------------------------------------------------|--------|-------|-----------|--------------|
| Time (hr)                                                | Conv % | $M_n$ | $M_w/M_n$ | $M_{n,theo}$ |
| 0.25                                                     | 6.8    | 7795  | 1.28      | 1218         |
| 1                                                        | 19.4   | 9909  | 1.41      | 3224         |
| 3                                                        | 24.0   | 11171 | 1.50      | 3949         |
| 5                                                        | 25.6   | 10771 | 1.54      | 4194         |
| 8                                                        | 26.7   | 10682 | 1.55      | 4377         |
| 22                                                       | 30.8   |       |           | 5031         |

| <i>Entry 9- CBL=20mg, AA=50mg, EBiB=5μL, Temp=60 °C</i> |        |       |           |              |
|---------------------------------------------------------|--------|-------|-----------|--------------|
| Time (hr)                                               | Conv % | $M_n$ | $M_w/M_n$ | $M_{n,theo}$ |
| 0.25                                                    | 13.8   | 5967  | 1.22      | 2386         |
| 1                                                       | 34.1   | 7346  | 1.48      | 5615         |
| 3                                                       | 46.2   | 9208  | 1.64      | 7537         |
| 5                                                       | 48.8   | 8351  | 1.58      | 7942         |
| 8                                                       | 49.9   | 8545  | 1.61      | 8132         |
| 22                                                      | 54.3   |       |           | 8822         |

| <i>Entry 10- LTV=10mg, AA=50mg, BPN=3μL, Temp=60 °C</i> |        |       |           |              |
|---------------------------------------------------------|--------|-------|-----------|--------------|
| Time (hr)                                               | Conv % | $M_n$ | $M_w/M_n$ | $M_{n,theo}$ |
| 0.25                                                    | 13.0   | 5405  | 1.21      | 2193         |
| 1                                                       | 23.9   | 6664  | 1.43      | 3938         |
| 3                                                       | 49.7   | 9513  | 1.66      | 8025         |
| 5                                                       | 59.2   | 10501 | 1.66      | 9535         |
| 8                                                       | 69.6   | 11357 | 1.68      | 11194        |
| 22                                                      | 85.7   | 12137 | 1.68      | 13748        |

| <i>Entry 11- HRP=10mg, AA=50mg, BPN=3μL, Temp=60 °C</i> |        |       |           |              |
|---------------------------------------------------------|--------|-------|-----------|--------------|
| Time (hr)                                               | Conv % | $M_n$ | $M_w/M_n$ | $M_{n,theo}$ |
| 0.25                                                    | 39.6   | 7138  | 1.51      | 6424         |
| 1                                                       | 77.0   | 9350  | 1.59      | 12369        |
| 3                                                       | 92.7   | 9544  | 1.60      | 14871        |

|   |      |       |      |       |
|---|------|-------|------|-------|
| 5 | 95.6 | 10156 | 1.58 | 15328 |
|---|------|-------|------|-------|

  

|                                                        |        |       |           |              |
|--------------------------------------------------------|--------|-------|-----------|--------------|
| <i>Entry 12- HRP=2mg, AA=50mg, BPN=3μL, Temp=60 °C</i> |        |       |           |              |
| Time (hr)                                              | Conv % | $M_n$ | $M_w/M_n$ | $M_{n,theo}$ |
| 0.25                                                   | 14.1   | 5119  | 1.23      | 2372         |
| 1                                                      | 29.6   | 6241  | 1.42      | 4843         |
| 3                                                      | 48.0   | 8126  | 1.56      | 7759         |
| 5                                                      | 56.8   | 8726  | 1.58      | 9162         |
| 8                                                      | 62.3   | 9550  | 1.53      | 10034        |
| 22                                                     | 64.6   | 9645  | 1.58      | 10404        |
